# Supplementary material for: The addition of rituximab to CHOP therapy alters the prognostic significance of CD44 expression
Source: PubMed Central journal article supplement (PMC4022142; doi:10.1186/1756-8722-7-34), 2014-04-16
Supplement: 1756-8722-7-34-S3.pdf [file 1756-8722-7-34-S3.pdf]

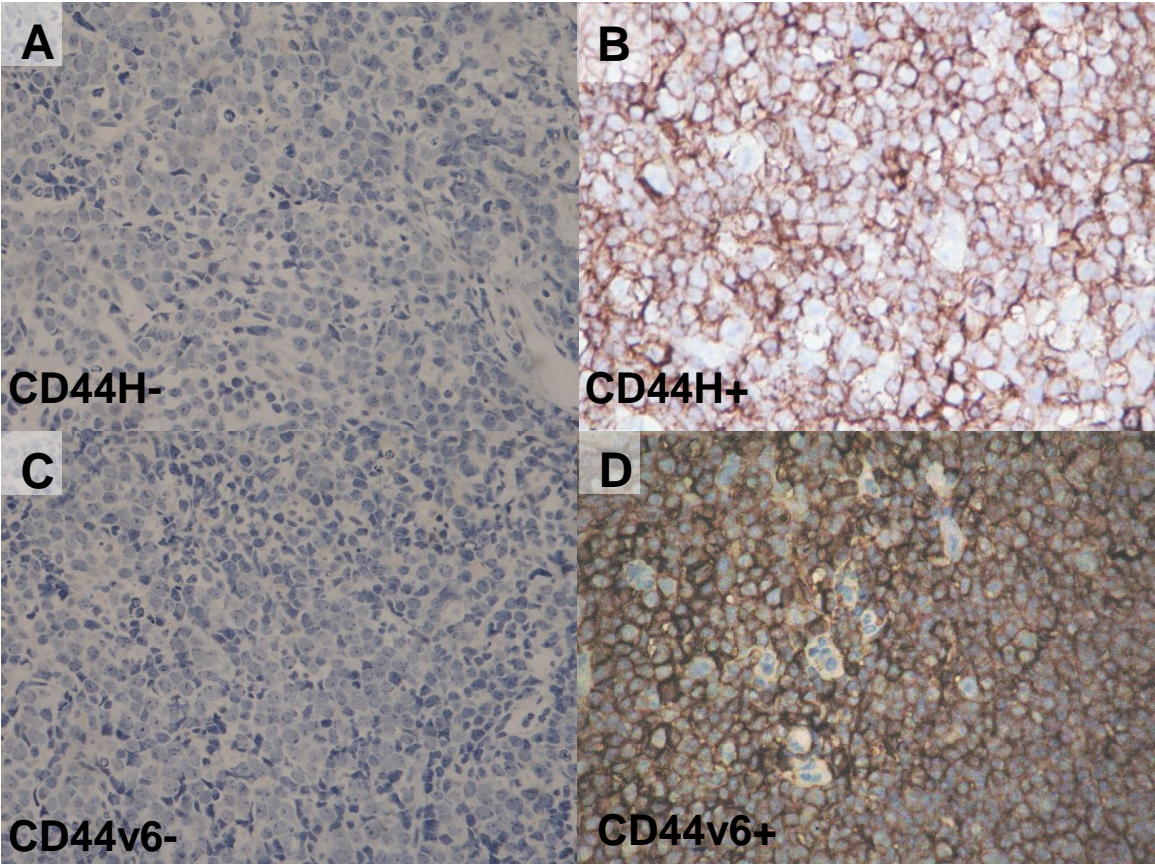

**Figure A1.** Representative immunohistochemical staining of DLBCL samples for CD44H and CD44v6 expression. (A, C), negative control stain using isotype-matched Abs. (B) CD44H staining in a positive case. (D) CD44v6 staining in a positive case.
